# Supplementary material
Source: publisher site journal article supplement (https://www.dovepress.com/article/328383)
Supplement: Supplementary file 1 [file get_supplementary_file.php]

Supplemental Table 1: The comparisons of low-grade inflammation status in different stroke subtypes.

| Variables | Without recurrence | Recurrent  IS | Recurrent  ICH | P |
| --- | --- | --- | --- | --- |
| LGI score |  |  |  | <0.001 |
| 1st quartile | 313 (30.2) a | 22 (13.8) b | 0 (0.0) b |  |
| 2nd quartile | 252 (24.3) a | 23 (14.5) b | 3 (16.7)a, b |  |
| 3rd quartile | 274 (26.4) a | 52 (32.7) a | 5 (27.8) a |  |
| 4th quartile | 198 (19.1) a | 62 (39.0) b | 10 (55.6) b |  |

Abbreviations: LGI, low-grade inflammation; IS, ischemic stroke; ICH, intracranial hemorrhage.

The different superscript letter (a or b) denoted a subset of stroke subtypes whose column proportions differed significantly from each other at the 0.05 level. For example, in the 1st level of LGI score, the proportions of 1st quartile of LGI score was significantly higher in the patients without recurrence compared with recurrent IS or ICH patients, while there was no significant difference between the IS and ICH groups.
